# Supplementary material for: Physicians’ Perspectives Regarding Private Equity Transactions in Outpatient Health Care—A Scoping Review and Qualitative Analysis
Source: MDPI journal article supplement (doi:10.3390/ijerph192315480), 2022-11-22
Supplement: s1 [file s1]

# Physicians' perspectives regarding private equity transactions in outpatient health care – a scoping review and qualitative analysis

Tim N. Nolte <sup>1</sup>, Felix Miedaner <sup>2</sup> and Sandra Sülz <sup>1,\*</sup>

## - Supplementary Material -

### Characteristics of interview participants

| Individual characteristics           | N ( <i>Mean</i> ) | % ( <i>SD</i> ) |
|--------------------------------------|-------------------|-----------------|
| Age                                  | <i>40.0</i>       | <i>12.4</i>     |
| Practicing time                      | <i>12.5</i>       | <i>10.6</i>     |
| Gender                               |                   |                 |
| Male                                 | 12                | 85.7            |
| Female                               | 2                 | 14.3            |
| Specialty                            |                   |                 |
| Dentistry                            | 9                 | 64.3            |
| Oral and maxillofacial surgery       | 2                 | 14.3            |
| Dermatology                          | 1                 | 7.1             |
| Paediatrics                          | 1                 | 7.1             |
| Ophtalmology                         | 1                 | 7.1             |
| Organization                         |                   |                 |
| Group practice                       | 9                 | 64.3            |
| Solo practice                        | 2                 | 14.3            |
| University hospital, outpatient care | 2                 | 14.3            |
| Practice group                       | 1                 | 7.1             |
| Employment status                    |                   |                 |
| Self-employed                        | 6                 | 42.9            |
| Employed                             | 8                 | 57.1            |
| Knowledge about PE                   |                   |                 |
| Yes                                  | 12                | 85.7            |
| No                                   | 2                 | 14.3            |
| Contact to PE                        |                   |                 |
| Yes                                  | 4                 | 28.6            |
| No                                   | 10                | 71.4            |

SD: standard deviation; Means and standard deviations are displayed in italic; Due to rounding, percentages may not add up to 100%. Group practice (Gemeinschaftspraxis) and practice group (Praxisgemeinschaft) are different cooperation forms in the German outpatient sector.

## Coding Tree

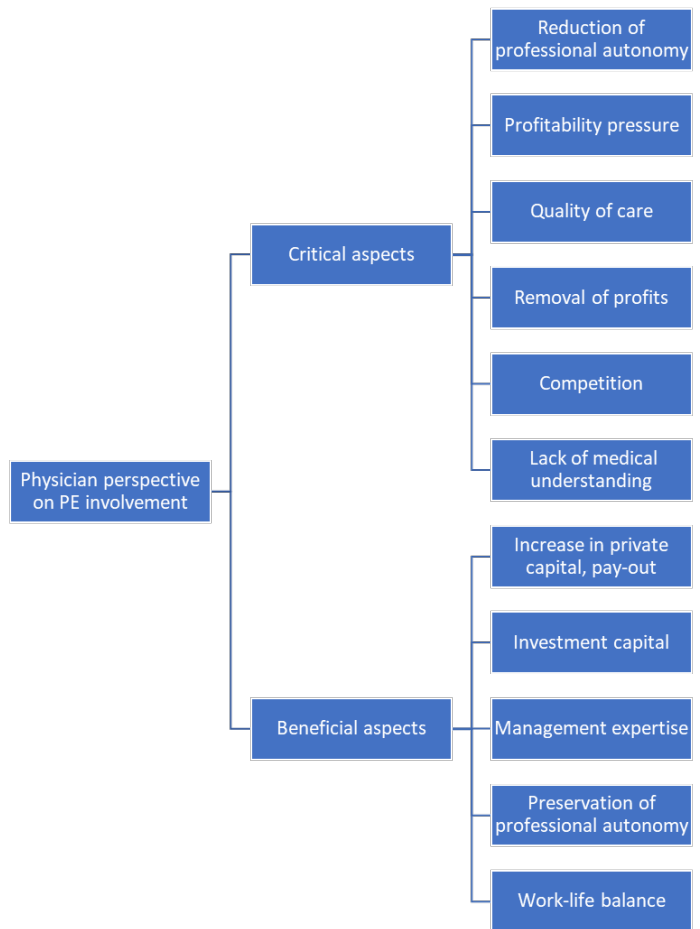

## Literature Table

| References                                                                                                                                                                                                                                                                                                                                                                                                                                                                 | Themes             |                 |                   |                |                   |          |
|----------------------------------------------------------------------------------------------------------------------------------------------------------------------------------------------------------------------------------------------------------------------------------------------------------------------------------------------------------------------------------------------------------------------------------------------------------------------------|--------------------|-----------------|-------------------|----------------|-------------------|----------|
|                                                                                                                                                                                                                                                                                                                                                                                                                                                                            | Physician autonomy | Quality of care | Work-life-balance | Sustainability | Lack of expertise | Taxation |
| aerzteblatt.de. Zahnärzte warnen vor MVZ-Übernahmen durch Kapitalinvestoren. <i>Dtsch. Ärzteblatt</i> 2018,. Available online: <a href="https://www.aerzteblatt.de/treffer?mode=s&amp;wo=1041&amp;typ=1&amp;nid=99030&amp;s=Private&amp;s=equity">https://www.aerzteblatt.de/treffer?mode=s&amp;wo=1041&amp;typ=1&amp;nid=99030&amp;s=Private&amp;s=equity</a> (accessed on 15 November 2022).                                                                             | x                  | x               |                   |                | x                 |          |
| aerzteblatt.de. Wir kennen keinen Fall, in dem Kapitalinteressen die ärztliche Entscheidung infrage gestellt hätten. <i>Dtsch. Ärzteblatt</i> 2018,. Available online: <a href="https://www.aerzteblatt.de/treffer?mode=s&amp;wo=1041&amp;typ=1&amp;nid=98076&amp;s=Private&amp;s=equity">https://www.aerzteblatt.de/treffer?mode=s&amp;wo=1041&amp;typ=1&amp;nid=98076&amp;s=Private&amp;s=equity</a> (accessed on 15 November 2022).                                     | x                  |                 | x                 |                |                   |          |
| aerzteblatt.de. Gesundheitssektor zieht Investoren an. Deutsches Ärzteblatt. 2019. Available online: <a href="https://www.aerzteblatt.de/treffer?mode=s&amp;wo=1041&amp;typ=1&amp;nid=102620&amp;s=Private&amp;s=equity">https://www.aerzteblatt.de/treffer?mode=s&amp;wo=1041&amp;typ=1&amp;nid=102620&amp;s=Private&amp;s=equity</a> (accessed on 15 November 2022).                                                                                                     |                    | x               |                   |                |                   | x        |
| aerzteblatt.de. Hartmannbund ruft zum Dialog über demografischen Wandel bei Ärzten auf. Deutsches Ärzteblatt. 2019. Available online: <a href="https://www.aerzteblatt.de/treffer?mode=s&amp;wo=1041&amp;typ=1&amp;nid=107278&amp;s=hartmannbund&amp;s=ruft">https://www.aerzteblatt.de/treffer?mode=s&amp;wo=1041&amp;typ=1&amp;nid=107278&amp;s=hartmannbund&amp;s=ruft</a> (accessed on 15 November 2022).                                                              |                    | x               |                   |                |                   |          |
| aerzteblatt.de. Union hat keine Bedenken bei Beteiligungen Renditeorientierter Kapitalanleger an MVZ. Deutsches Ärzteblatt. 2019. Available online: <a href="https://www.aerzteblatt.de/treffer?mode=s&amp;wo=1041&amp;typ=1&amp;nid=107370&amp;s=Kapitalanleger&amp;s=MVZ&amp;s=Union">https://www.aerzteblatt.de/treffer?mode=s&amp;wo=1041&amp;typ=1&amp;nid=107370&amp;s=Kapitalanleger&amp;s=MVZ&amp;s=Union</a> (accessed on 15 November 2022).                      |                    | x               |                   | x              |                   |          |
| aerzteblatt.de. Gesundheitsexperten Stehen Fremdinvestoren Überwiegend Kritisch Gegenüber. Deutsches Ärzteblatt. 2020. Available online: <a href="https://www.aerzteblatt.de/treffer?mode=s&amp;wo=&amp;typ=1&amp;nid=110813&amp;s=Gesundheitsexperten&amp;s=fremdinvestoren&amp;s=kritisch">https://www.aerzteblatt.de/treffer?mode=s&amp;wo=&amp;typ=1&amp;nid=110813&amp;s=Gesundheitsexperten&amp;s=fremdinvestoren&amp;s=kritisch</a> (accessed on 15 November 2022). |                    | x               |                   | x              |                   |          |
| Allroggen, S. Veränderung der Zahnmedizinischen Versorgungsstruktur aus Sicht einer Kassenzahnärztlichen Vereinigung. <i>MKG Chir.</i> 2020, 13, 10–19. <a href="https://doi.org/10.1007/s12285-019-00236-3">https://doi.org/10.1007/s12285-019-00236-3</a> .                                                                                                                                                                                                              | x                  | x               | x                 | x              |                   |          |
| Appelbaum, E.; Batt, R. <i>Private Equity Buyouts in Healthcare: Who Wins, Who Loses?</i> ; Institute for New Economic Thinking Working: New York, NY, USA, 2020. <a href="https://doi.org/10.36687/inetwp118">https://doi.org/10.36687/inetwp118</a> .                                                                                                                                                                                                                    | x                  | x               |                   | x              |                   |          |
| arzt-wirtschaft.de. Pflegeheime und Praxen: Finanzinvestoren Greifen nach der Gesundheitsbranche. A&W Online 2019. Available online: <a href="https://www.arzt-wirtschaft.de/finanzen/geldanlagen/pflegeheime-und-praxen-finanzinvestoren-greifen-nach-der-gesundheitsbranche/">https://www.arzt-wirtschaft.de/finanzen/geldanlagen/pflegeheime-und-praxen-finanzinvestoren-greifen-nach-der-gesundheitsbranche/</a> (accessed on 15 November 2022).                       |                    |                 |                   | x              |                   | x        |
| Arzt-wirtschaft.de. Bundeszahnärztekammer fordert Stopp von Fremdkapital in der Zahnmedizin. A&W Online. 2020. Available online: <a href="https://www.arzt-wirtschaft.de/finanzen/honorare/bundeszahnarztekkammer-fordert-stopp-von-fremdkapital-in-der-zahnmedizin/">https://www.arzt-wirtschaft.de/finanzen/honorare/bundeszahnarztekkammer-fordert-stopp-von-fremdkapital-in-der-zahnmedizin/</a> (accessed on 15 November 2022).                                       | x                  | x               |                   | x              |                   | x        |
| Bennett, R.G. Further thoughts on dermatology and equity-owned dermatology practices. <i>J. Am. Acad. Dermatol.</i> 2019, 81, e11–e12. <a href="https://doi.org/10.1016/j.jaad.2018.11.055">https://doi.org/10.1016/j.jaad.2018.11.055</a> .                                                                                                                                                                                                                               |                    | x               |                   |                |                   |          |

| References                                                                                                                                                                                                                                                                                                                                                                                                                                                                                                                                          | Themes             |                 |                   |                |                   |          |
|-----------------------------------------------------------------------------------------------------------------------------------------------------------------------------------------------------------------------------------------------------------------------------------------------------------------------------------------------------------------------------------------------------------------------------------------------------------------------------------------------------------------------------------------------------|--------------------|-----------------|-------------------|----------------|-------------------|----------|
|                                                                                                                                                                                                                                                                                                                                                                                                                                                                                                                                                     | Physician autonomy | Quality of care | Work-life-balance | Sustainability | Lack of expertise | Taxation |
| Bennett, R.G. Conflicts of interest for physician owners of private equity—Owned medical practices. <i>J. Am. Acad. Dermatol.</i> <b>2020</b> , <i>82</i> , e35. <a href="https://doi.org/10.1016/j.jaad.2019.09.033">https://doi.org/10.1016/j.jaad.2019.09.033</a> .                                                                                                                                                                                                                                                                              |                    | x               |                   |                |                   |          |
| Bobsin, R. <i>Finanzinvestoren in der Gesundheitsversorgung in Deutschland: 20 Jahre Private Equity—Eine Bestandsaufnahme</i> , 4th ed.; Offizin-Verlag: Hannover, Germany, 2019.                                                                                                                                                                                                                                                                                                                                                                   | x                  | x               |                   | x              |                   | x        |
| Bruch, J.D.; Borsa, A.; Song, Z.; Richardson, S.S. Expansion of Private Equity Involvement in Women’s Health Care. <i>JAMA Intern. Med.</i> <b>2020</b> , <i>180</i> , 1542–1545. <a href="https://doi.org/10.1001/jamainternmed.2020.3567">https://doi.org/10.1001/jamainternmed.2020.3567</a> .                                                                                                                                                                                                                                                   |                    | x               |                   | x              | x                 |          |
| Casalino, L.P.; Saiani, R.; Bhidya, S.; Khullar, D.; O'Donnell, E. Private equity acquisition of physician practices. <i>Ann. Intern. Med.</i> <b>2019</b> , <i>170</i> , 114–115. <a href="https://doi.org/10.7326/M18-2363">https://doi.org/10.7326/M18-2363</a> .                                                                                                                                                                                                                                                                                | x                  | x               |                   |                | x                 |          |
| DeCamp, M.; Sulmasy, L.S. Ethical and Professionalism Implications of Physician Employment and Health Care Business Practices: A Policy Paper From the American College of Physicians. <i>Ann. Intern. Med.</i> <b>2021</b> , <i>174</i> , 844–851. <a href="https://doi.org/10.7326/m20-7093">https://doi.org/10.7326/m20-7093</a> .                                                                                                                                                                                                               | x                  | x               |                   | x              | x                 |          |
| DeWane, M.E.; Mostow, E.; Grant-Kels, J.M. The corporatization of care in academic dermatology. <i>Clin. Dermatol.</i> <b>2020</b> , <i>38</i> , 289–295. <a href="https://doi.org/10.1016/j.clindermatol.2020.02.003">https://doi.org/10.1016/j.clindermatol.2020.02.003</a> .                                                                                                                                                                                                                                                                     | x                  | x               |                   | x              | x                 |          |
| Engel, P. Profit auf Kosten der Patientinnen und Patienten? <i>MKG Chir.</i> <b>2020</b> , <i>13</i> , 6–9. <a href="https://doi.org/10.1007/s12285-019-00230-9">https://doi.org/10.1007/s12285-019-00230-9</a> .                                                                                                                                                                                                                                                                                                                                   | x                  | x               | x                 | x              |                   | x        |
| Ennenbach, R. Ist Private Equity für die ambulante Versorgung notwendig, ein Fortschritt oder eine Gefahr? <i>MKG Chir.</i> <b>2020</b> , <i>13</i> , 3–5. <a href="https://doi.org/10.1007/s12285-020-00241-x">https://doi.org/10.1007/s12285-020-00241-x</a> .                                                                                                                                                                                                                                                                                    | x                  | x               | x                 | x              |                   | x        |
| Francis, J.; Konda, S.; Motaparathi, K.; Grant-Kels, J.M. Response to letter to the editor from Bennett and further thoughts on the corporatization of dermatology and private equity-backed dermatology groups. <i>J. Am. Acad. Dermatol.</i> <b>2019</b> , <i>81</i> , e13–e14. <a href="https://doi.org/10.1016/j.jaad.2019.03.024">https://doi.org/10.1016/j.jaad.2019.03.024</a> .                                                                                                                                                             | x                  | x               |                   | x              |                   |          |
| Gilreath, M.; Patel, N.C.; Suh, J.; Brill, J.V. Gastroenterology Physician Practice Management and Private Equity: Thriving in Uncertain Times. <i>Clin. Gastroenterol. Hepatol.</i> <b>2021</b> , <i>19</i> , 1084–1087. <a href="https://doi.org/10.1016/j.cgh.2021.03.015">https://doi.org/10.1016/j.cgh.2021.03.015</a> .                                                                                                                                                                                                                       | x                  |                 |                   | x              | x                 |          |
| Glöser, S. Gesundheitswesen wird für Investoren immer attraktiver. <i>Dtsch. Ärzteblatt</i> <b>2019</b> , <i>116</i> , 4. Available online: <a href="https://www.aerzteblatt.de/treffer?mode=s&amp;wo=1041&amp;typ=16&amp;aid=206759&amp;s=Gesundheitswesen&amp;s=Investoren&amp;s=attraktiver&amp;s=f%FCr&amp;s=immer&amp;s=wird">https://www.aerzteblatt.de/treffer?mode=s&amp;wo=1041&amp;typ=16&amp;aid=206759&amp;s=Gesundheitswesen&amp;s=Investoren&amp;s=attraktiver&amp;s=f%FCr&amp;s=immer&amp;s=wird</a> (accessed on 15 November 2022). |                    |                 |                   | x              |                   | x        |
| Gondi, S.; Song, Z. Private Equity Investment in Health Care. <i>JAMA J. Am. Med. Assoc.</i> <b>2019</b> , <i>322</i> , 468–469. <a href="https://doi.org/10.1001/jama.2019.7844">https://doi.org/10.1001/jama.2019.7844</a> .                                                                                                                                                                                                                                                                                                                      |                    | x               |                   |                | x                 |          |
| Gondi, S.; Song, Z. Potential Implications of Private Equity Investments in Health Care Delivery. <i>JAMA J. Am. Med. Assoc.</i> <b>2019</b> , <i>321</i> , 1047–1048. <a href="https://doi.org/10.1001/jama.2019.1077">https://doi.org/10.1001/jama.2019.1077</a> .                                                                                                                                                                                                                                                                                |                    | x               |                   | x              | x                 |          |
| Haaß, F.A.; Ochmann, R.; Julia, G.; Albrecht, M.; Nolting, H.-D. <i>Investorenbetriebene MVZ in der Vertragszahnärztlichen Versorgung: Entwicklung und Auswirkungen</i> ; Duncker Humblot GmbH: Berlin, Germany, 2021.                                                                                                                                                                                                                                                                                                                              | x                  | x               |                   | x              |                   |          |

| References                                                                                                                                                                                                                                                                                                                                                                                                                                                      | Themes             |                 |                   |                |                   |          |
|-----------------------------------------------------------------------------------------------------------------------------------------------------------------------------------------------------------------------------------------------------------------------------------------------------------------------------------------------------------------------------------------------------------------------------------------------------------------|--------------------|-----------------|-------------------|----------------|-------------------|----------|
|                                                                                                                                                                                                                                                                                                                                                                                                                                                                 | Physician autonomy | Quality of care | Work-life-balance | Sustainability | Lack of expertise | Taxation |
| Hilienhof, A. Gesundheitsmarkt: Finanzinvestoren auf dem Vormarsch. <i>Dtsch. Ärzteblatt</i> <b>2019</b> , 116, A340. Available online: <a href="https://www.aerzteblatt.de/treffer?mode=s&amp;wo=1041&amp;typ=16&amp;aid=205710&amp;s=Investoren&amp;s=Vormarsch&amp;s=auf&amp;s=dem">https://www.aerzteblatt.de/treffer?mode=s&amp;wo=1041&amp;typ=16&amp;aid=205710&amp;s=Investoren&amp;s=Vormarsch&amp;s=auf&amp;s=dem</a> (accessed on 15 November 2022). |                    |                 |                   | X              |                   | X        |
| Hsu, A.; Kohli, N. YPS Report: The Role of Private Equity in Medicine. <i>Mo. Med.</i> <b>2018</b> , 115, 333. Available online: <a href="http://www.ncbi.nlm.nih.gov/pubmed/30228757">http://www.ncbi.nlm.nih.gov/pubmed/30228757</a> (accessed on 15 November 2022).                                                                                                                                                                                          | X                  | X               |                   | X              |                   | X        |
| Khetpal, S.; Lopez, J.; Steinbacher, D.M. Trends in Private Equity Deals in Oral and Maxillofacial Surgery and Dentistry. <i>J. Oral Maxillofac. Surg.</i> <b>2021</b> , 79, 513–515. <a href="https://doi.org/10.1016/j.joms.2020.10.010">https://doi.org/10.1016/j.joms.2020.10.010</a> .                                                                                                                                                                     | X                  | X               |                   |                | X                 |          |
| Kirsh, G.M.; Kapoor, D.A. Private Equity and Urology: An Emerging Model for Independent Practice. <i>Urol. Clin. N. Am.</i> <b>2021</b> , 48, 233–244. <a href="https://doi.org/10.1016/j.ucl.2020.12.004">https://doi.org/10.1016/j.ucl.2020.12.004</a> .                                                                                                                                                                                                      |                    |                 |                   | X              | X                 |          |
| Konda, S.; Francis, J. The evolution of private equity in dermatology. <i>Clin. Dermatol.</i> <b>2020</b> , 38, 275–283. <a href="https://doi.org/10.1016/j.clindermatol.2020.02.007">https://doi.org/10.1016/j.clindermatol.2020.02.007</a> .                                                                                                                                                                                                                  | X                  | X               |                   | X              | X                 |          |
| Konda, S.; Francis, J.; Motaparthy, K.; Grant-Kels, J.M. Future considerations for clinical dermatology in the setting of 21st century American policy reform: Corporatization and the rise of private equity in dermatology. <i>J. Am. Acad. Dermatol.</i> <b>2019</b> , 81, 287–296.e8. <a href="https://doi.org/10.1016/j.jaad.2018.09.052">https://doi.org/10.1016/j.jaad.2018.09.052</a> .                                                                 |                    | X               |                   | X              | X                 |          |
| Korzilius, H. Ambulante Versorgung: Investoren auf Einkaufstour. <i>Dtsch. Ärzteblatt</i> <b>2018</b> , 115, A1688–1692. Available online: <a href="https://www.aerzteblatt.de/archiv/201014/Ambulante-Versorgung-Investoren-auf-Einkaufstour">https://www.aerzteblatt.de/archiv/201014/Ambulante-Versorgung-Investoren-auf-Einkaufstour</a> (accessed on 15 November 2022).                                                                                    |                    | X               | X                 | X              |                   |          |
| Laschet, H. Investoren im Gesundheitswesen: Plage oder Partner fürs Gemeinwohl? <i>Ärzte Zeitung</i> . 2020. Available online: <a href="https://www.aerztezeitung.de/Politik/Investoren-im-Gesundheitswesen-Plage-oder-Partner-fuers-Gemeinwohl-413318.html">https://www.aerztezeitung.de/Politik/Investoren-im-Gesundheitswesen-Plage-oder-Partner-fuers-Gemeinwohl-413318.html</a> (accessed on 15 November 2022).                                            |                    |                 |                   | X              |                   | X        |
| Laschet, H. Versorgung: Private Equity ist auch eine Chance. <i>Ärzte Zeitung</i> . 2021. Available online: <a href="https://www.aerztezeitung.de/Politik/Private-Equity-ist-auch-eine-Chance-417854.html">https://www.aerztezeitung.de/Politik/Private-Equity-ist-auch-eine-Chance-417854.html</a> (accessed on 15 November 2022).                                                                                                                             | X                  | X               | X                 | X              |                   | X        |
| Laschet, H. Finanzierung: Private Equity in MVZ? Mehr Evidenz täte der Debatte gut. <i>Ärzte Zeitung</i> . 2021. Available online: <a href="https://www.aerztezeitung.de/Wirtschaft/Private-Equity-in-MVZ-Mehr-Evidenz-taete-der-Debatte-gut-419020.html">https://www.aerztezeitung.de/Wirtschaft/Private-Equity-in-MVZ-Mehr-Evidenz-taete-der-Debatte-gut-419020.html</a> (accessed on 15 November 2022).                                                      |                    | X               | X                 | X              |                   |          |
| Lundy, D.W. A Day at the Office: Private Practice and Private Equity. <i>Clin. Orthop. Relat. Res.</i> <b>2019</b> , 477, 955–957. <a href="https://doi.org/10.1097/CORR.0000000000000758">https://doi.org/10.1097/CORR.0000000000000758</a> .                                                                                                                                                                                                                  |                    | X               |                   | X              | X                 |          |
| Maibach-Nagel, E. Fremdinvestoren im Gesundheitssystem: Ungesunder Wettbewerb. <i>Dtsch. Ärzteblatt</i> <b>2018</b> , 115, A-1675. Available online: <a href="https://www.aerzteblatt.de/archiv/201003/Fremdinvestoren-im-Gesundheitssystem-Ungesunder-Wettbewerb">https://www.aerzteblatt.de/archiv/201003/Fremdinvestoren-im-Gesundheitssystem-Ungesunder-Wettbewerb</a> (accessed on 15 November 2022).                                                      |                    |                 |                   | X              | X                 |          |
| Miller, L.E.; Rath, V.K.; Naunheim, M.R. Implications of Private Equity Acquisition of Otolaryngology Physician Practices. <i>JAMA Otolaryngol. Head Neck Surg.</i> <b>2020</b> , 146, 97–98. <a href="https://doi.org/10.1001/jamaoto.2019.3738">https://doi.org/10.1001/jamaoto.2019.3738</a> .                                                                                                                                                               | X                  | X               | X                 | X              | X                 |          |

| References                                                                                                                                                                                                                                                                                                                                                                                                                                                                    | Themes             |                 |                   |                |                   |          |
|-------------------------------------------------------------------------------------------------------------------------------------------------------------------------------------------------------------------------------------------------------------------------------------------------------------------------------------------------------------------------------------------------------------------------------------------------------------------------------|--------------------|-----------------|-------------------|----------------|-------------------|----------|
|                                                                                                                                                                                                                                                                                                                                                                                                                                                                               | Physician autonomy | Quality of care | Work-life-balance | Sustainability | Lack of expertise | Taxation |
| Montgomery, U.F. Investoren in der ambulanten Versorgung: Erst der Patient, dann die Ökonomie. <i>Dtsch Ärzteblatt</i> <b>2018</b> , <i>115</i> , A1692. Available online: <a href="https://www.aerzteblatt.de/treffer?mode=s&amp;wo=1041&amp;typ=16&amp;aid=201048&amp;s=Private&amp;s=equity">https://www.aerzteblatt.de/treffer?mode=s&amp;wo=1041&amp;typ=16&amp;aid=201048&amp;s=Private&amp;s=equity</a> (accessed on 15 November 2022).                                |                    | x               |                   | x              |                   | x        |
| Moses, M.J.; Weiser, L.G.; Bosco, J.A. The Corporate Practice of Medicine. <i>J. Bone Joint Surg.</i> <b>2020</b> , <i>102</i> , e53. <a href="https://doi.org/10.2106/JBJS.19.01404">https://doi.org/10.2106/JBJS.19.01404</a> .                                                                                                                                                                                                                                             | x                  | x               |                   | x              |                   |          |
| Novice, T.; Portney, D.; Eshaq, M. Dermatology resident perspectives on practice ownership structures and private equity-backed group practices. <i>Clin. Dermatol.</i> <b>2020</b> , <i>38</i> , 296–302. <a href="https://doi.org/10.1016/j.clindermatol.2020.02.008">https://doi.org/10.1016/j.clindermatol.2020.02.008</a> .                                                                                                                                              | x                  | x               |                   | x              |                   |          |
| O'Donnell, E.M.; Lelli, G.J.; Bhidya, S.; Casalino, L.P. The Growth of Private Equity Investment in Health Care: Perspectives from Ophthalmology. <i>Health Affairs</i> <b>2020</b> , <i>39</i> , 1026–1031. <a href="https://doi.org/10.1377/hlthaff.2019.01419">https://doi.org/10.1377/hlthaff.2019.01419</a> .                                                                                                                                                            | x                  | x               |                   | x              | x                 |          |
| Osterloh, F. Patientenversorgung unter Druck: Gegen die Kommerzialisierung. <i>Deutsches Ärzteblatt</i> , 116. 2019. Available online: <a href="https://www.aerzteblatt.de/archiv/207864/Patientenversorgung-unter-Druck-Gegen-die-Kommerzialisierung">https://www.aerzteblatt.de/archiv/207864/Patientenversorgung-unter-Druck-Gegen-die-Kommerzialisierung</a> (accessed on 15 November 2022).                                                                              |                    | x               |                   |                |                   | x        |
| Patel, N.A.; Afshar, S. Implications of Private Equity in Oral and Maxillofacial Surgery. <i>J. Oral Maxillofac. Surg.</i> <b>2020</b> , <i>78</i> , 1456–1458. <a href="https://doi.org/10.1016/j.joms.2020.03.046">https://doi.org/10.1016/j.joms.2020.03.046</a> .                                                                                                                                                                                                         | x                  | x               |                   | x              |                   |          |
| Patel, N.S.; Groth, S.; Sternberg, P. The Emergence of Private Equity in Ophthalmology. <i>J. Am. Acad. Dermatol.</i> <b>2019</b> , <i>137</i> , 601–602. <a href="https://doi.org/10.1001/jamaophthalmol.2019.0964">https://doi.org/10.1001/jamaophthalmol.2019.0964</a> .                                                                                                                                                                                                   | x                  | x               | x                 | x              | x                 |          |
| Reddy, R. Private Equity Investments in Women's Health and Obstetrics and Gynecology Practices. <i>Obstet. Gynecol.</i> <b>2020</b> , <i>136</i> , 1217–1220. <a href="https://doi.org/10.1097/AOG.0000000000004151">https://doi.org/10.1097/AOG.0000000000004151</a> .                                                                                                                                                                                                       | x                  | x               | x                 | x              | x                 | x        |
| Resneck, J.S.; Philip, R.L. Dermatology practice consolidation fueled by private equity investment potential consequences for the specialty and patients. <i>JAMA Dermatol.</i> <b>2018</b> , <i>154</i> , 13–14. <a href="https://doi.org/10.1001/jamadermatol.2017.5558">https://doi.org/10.1001/jamadermatol.2017.5558</a> .                                                                                                                                               | x                  | x               |                   | x              | x                 | x        |
| Resnick, M.J. Re: The growth of private equity investment in health care: Perspectives from ophthalmology. <i>J. Urol.</i> <b>2020</b> , <i>204</i> , 1371. <a href="https://doi.org/10.1097/JU.0000000000001278.02">https://doi.org/10.1097/JU.0000000000001278.02</a> .                                                                                                                                                                                                     |                    | x               |                   | x              | x                 |          |
| Satiani, B.; Zigrang, T.A.; Bailey-Wheaton, J.L. Should surgeons consider partnering with private equity investors? <i>Am. J. Surg.</i> <b>2020</b> , <i>222</i> , 453–458. <a href="https://doi.org/10.1016/j.amjsurg.2020.12.028">https://doi.org/10.1016/j.amjsurg.2020.12.028</a> .                                                                                                                                                                                       | x                  | x               |                   |                | x                 | x        |
| Scheffler, R.M.; Alexander, L.M.; Godwin, J.R. Soaring Private Equity Investment in the Healthcare Sector: Consolidation Accelerated, Competition Undermined, and Patients at Risk. 2021. Available online: <a href="https://publichealth.berkeley.edu/wp-content/uploads/2021/05/Private-Equity-I-Healthcare-Report-FINAL.pdf">https://publichealth.berkeley.edu/wp-content/uploads/2021/05/Private-Equity-I-Healthcare-Report-FINAL.pdf</a> (accessed on 15 November 2022). | x                  | x               |                   | x              | x                 | x        |
| Scheuplein, C.; Evans, L.M.; Merkel, S. <i>Übernahmen durch Private Equity in Deutschen Gesundheitssektor: Eine Zwischenbilanz für die Jahre 2013 bis 2018</i> ; IAT: Gelsenkirchen, Germany, 2019. <a href="https://doi.org/http://dx.doi.org/10.13140/RG.2.2.30503.19366">https://doi.org/http://dx.doi.org/10.13140/RG.2.2.30503.19366</a> . IAT Discussion Paper No. 19/01.                                                                                               |                    |                 |                   | x              |                   | x        |
| Skaljic, M.; Lipoff, J.B. Association of private equity ownership with increased employment of advanced practice professionals in outpatient dermatology offices. <i>J. Am. Acad. Dermatol.</i> <b>2021</b> , <i>84</i> , 1178–1180. <a href="https://doi.org/10.1016/j.jaad.2020.05.024">https://doi.org/10.1016/j.jaad.2020.05.024</a> .                                                                                                                                    |                    | x               |                   | x              |                   |          |

| References                                                                                                                                                                                                                                                                                                                                                                                                                                                                                                                                                         | Themes             |                 |                   |                |                   |          |
|--------------------------------------------------------------------------------------------------------------------------------------------------------------------------------------------------------------------------------------------------------------------------------------------------------------------------------------------------------------------------------------------------------------------------------------------------------------------------------------------------------------------------------------------------------------------|--------------------|-----------------|-------------------|----------------|-------------------|----------|
|                                                                                                                                                                                                                                                                                                                                                                                                                                                                                                                                                                    | Physician autonomy | Quality of care | Work-life-balance | Sustainability | Lack of expertise | Taxation |
| Springer Medizin. Die Gesichter der dentalen Ketten. <i>Junge Zahnarzt</i> <b>2019</b> , 10, 24–33. <a href="https://doi.org/10.1007/s13279-019-0044-x">https://doi.org/10.1007/s13279-019-0044-x</a> .                                                                                                                                                                                                                                                                                                                                                            | x                  | x               | x                 | x              |                   |          |
| Tan, S.; Seiger, K.; Renehan, P.; Mostaghimi, A. Trends in Private Equity Acquisition of Dermatology Practices in the United States. <i>JAMA Dermatol.</i> <b>2019</b> , 155, 1013–1021. <a href="https://doi.org/10.1001/jamadermatol.2019.1634">https://doi.org/10.1001/jamadermatol.2019.1634</a> .                                                                                                                                                                                                                                                             | x                  | x               |                   | x              | x                 |          |
| Waldmann, R.; Kelsey, A.; Grant-Kels, J.M. Comment on: Conflicts of interest for physician owners of private equity–owned medical practices. <i>J. Am. Acad. Dermatol.</i> <b>2020</b> , 82, e33. <a href="https://doi.org/10.1016/j.jaad.2019.08.087">https://doi.org/10.1016/j.jaad.2019.08.087</a> .                                                                                                                                                                                                                                                            |                    | x               |                   |                |                   |          |
| Wasner, A. Wie stark werden sich Private-Equity- Übernahmen auf die ambulante Versorgung auswirken? Medical Tribune. 2019. Available online: <a href="https://www.medical-tribune.de/praxis-und-wirtschaft/niederlassung-und-kooperation/artikel/wie-stark-werden-sich-private-equity-uebernahmen-auf-die-ambulante-versorgung-auswirken/">https://www.medical-tribune.de/praxis-und-wirtschaft/niederlassung-und-kooperation/artikel/wie-stark-werden-sich-private-equity-uebernahmen-auf-die-ambulante-versorgung-auswirken/</a> (accessed on 15 November 2022). |                    | x               |                   | x              |                   | x        |
| Wasner, A. Zahl der MVZ in Private-Equity-Besitz auch 2020 gestiegen. Medical Tribune. 2021. Available online: <a href="https://www.medical-tribune.de/praxis-und-wirtschaft/niederlassung-und-kooperation/artikel/zahl-der-mvz-in-private-equity-besitz-auch-2020-gestiegen/">https://www.medical-tribune.de/praxis-und-wirtschaft/niederlassung-und-kooperation/artikel/zahl-der-mvz-in-private-equity-besitz-auch-2020-gestiegen/</a> (accessed on 15 November 2022).                                                                                           |                    | x               |                   | x              |                   |          |
| Zhu, J.M.; Polsky, D. Private Equity and Physician Medical Practices—Navigating a Changing Ecosystem. <i>N. Engl. J. Med.</i> <b>2021</b> , 384, 981–983. <a href="https://doi.org/10.1056/NEJMp2032115">https://doi.org/10.1056/NEJMp2032115</a> .                                                                                                                                                                                                                                                                                                                | x                  | x               |                   | x              | x                 |          |
| Zhu, J.M.; Hua, L.M.; Polsky, D. Private Equity Acquisitions of Physician Medical Groups Across Specialties, 2013-2016. <i>JAMA J. Am. Med. Assoc.</i> <b>2020</b> , 323, 663–665. <a href="https://doi.org/10.1097/JU.0000000000001215">https://doi.org/10.1097/JU.0000000000001215</a> .                                                                                                                                                                                                                                                                         |                    | x               |                   |                |                   |          |
